# Supplementary material for: A potential role of transposon IS431 in the loss of mecA gene
Source: PubMed Central journal article supplement (PMC5264636; doi:10.1038/srep41237), 2017-01-25
Supplement: srep41237-s1.pdf [file srep41237-s1.pdf]

These are the supplementary materials of our manuscript (SREP-16-01706A) entitled “A potential role of transposon IS431 in the loss of *mecA* gene”. The authors of our manuscript are Aihua Wang<sup>1#</sup>, Kai Zhou<sup>2#</sup>, Yang Liu<sup>3#</sup>, Liang Yang<sup>3</sup>, Qin Zhang<sup>4</sup>, Jing Guan<sup>1</sup>, Nanshan Zhong<sup>1</sup>, Chao Zhuo<sup>1\*</sup>.

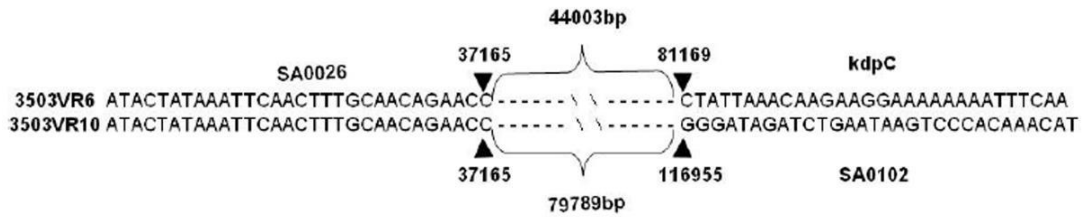

Figure S1. SCC*mec* deletion site in 3503VR6 and 3503VR10

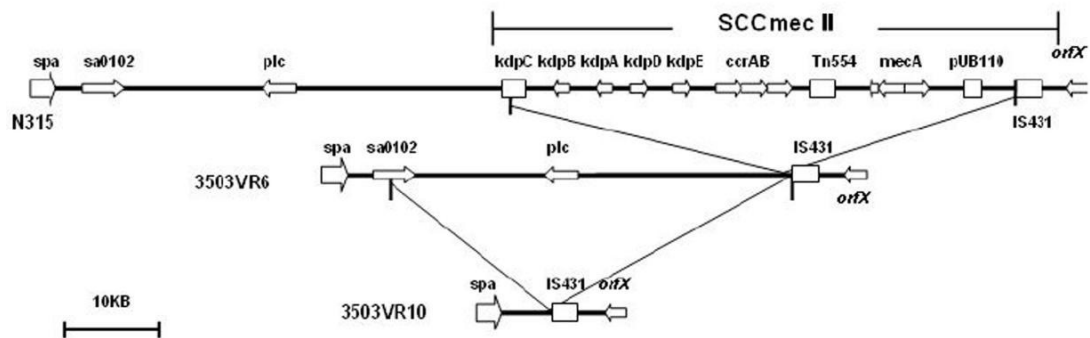

Figure S2. Schematic diagram showing the deletion regions of strains 3503VR6 and 3503VR10
